# Supplementary material for: Do Specialized Cells Play a Major Role in Organic Xenobiotic Detoxification in Higher Plants?
Source: PubMed Central journal article supplement (PMC7363956; doi:10.3389/fpls.2020.01037), 2020-07-09
Supplement: Image_1.pdf [file Image_1.pdf]

*Supplementary figure*

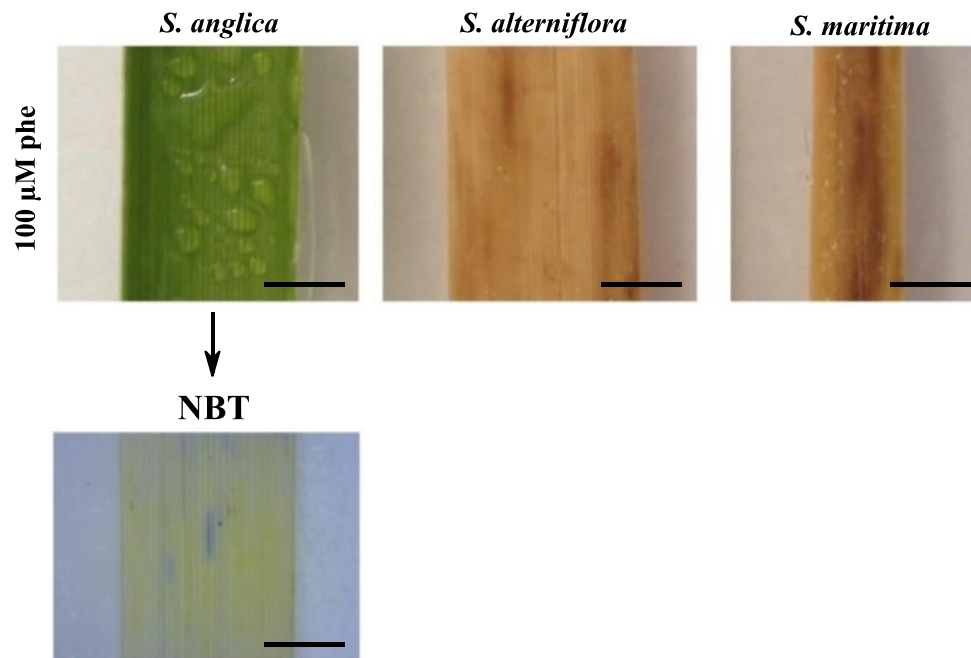

**Supplementary Fig. S1.** Phenotypical changes and superoxide radical production in *Spartina* leaves following long phe (100  $\mu$ M) treatment (one month). *S. anglica* did not exhibit phenotypical stress markers, unlike the parental species *S. alterniflora* and *S. maritima* which lost all the photosynthetic pigment contents and turned senescent, indicating a high degradation and cell death phenotype. Scale bars = 5 mm.
